# Supplementary material
Source: HighWire-hosted journal article supplement (https://www.genetics.org/content/suppl/2016/09/07/genetics.116.193169)
Supplement: TableS2.pdf [file TableS2.pdf]

**Table S2:** PCR-based markers used for recombination mapping

| Marker              | Nearest gene     | Primer name (5' to 3' sequence)                                                             | Enzyme       | Amplicon size (bp) |            |
|---------------------|------------------|---------------------------------------------------------------------------------------------|--------------|--------------------|------------|
|                     |                  |                                                                                             |              | Col                | Ler        |
| <b>Chromosome 2</b> |                  |                                                                                             |              |                    |            |
| RGA1                | <i>At2g01570</i> | RGA1-1 (GGTTCGTCCGGTTTAGCGCCGGCAC)<br>RGA1-2 (CAGTTCCGGTTTAGGTCTTGGTCCG)                    | <i>RsaI</i>  | 185,<br>112        | 297        |
| T8K22               | <i>At2g02670</i> | T8K22-1 (TCCGCGAACGAACAGGAG)<br>T8K22-2 (GCAAGGTTTGTGCTAATAA)                               |              | 123                | 112        |
| T20F6               | <i>At2g02800</i> | T20F6-1 (TTCGTGTAGGAGCAATAG)<br>T20F6-2 (CCCTTCGTTCTCAACATC)                                |              | 168                | 119        |
| PLS2                | <i>At2g19290</i> | PLS2-1 (TACGCGAATTATTTTTAGGAGA)<br>PLS2-2 (AATTTATTTTGAGTCGGATGC)                           |              | 70                 | 80         |
| Ped1                | <i>At2g33150</i> | Ped1-1 (CCAGCCAAGTAAGTGATGGTGCAGG)<br>Ped1-2 (GCAGGGTCAACACCAACTGCAGC)                      |              | 289                | 257        |
| SEC 221             | <i>At2g45540</i> | SEC221-1 (GGTGTTTTTGCATGGTTCTTTTCGCTTC)<br>SEC221-Taql (ATATGAATTTGAACCGCACAATAGCCGTCG)     | <i>TaqI</i>  | 172                | 143,<br>29 |
| SNP9553             | <i>At2g46720</i> | SNP9553-1 (TGC GTTTGATGTTTTGAATATGTATGAGAAG)<br>SNP9553-2 (ATATAAGTCACAATTATTTGCAGCCG)      | <i>MbolI</i> | 219                | 187,<br>32 |
| <b>Chromosome 3</b> |                  |                                                                                             |              |                    |            |
| nga172              | <i>At3g03340</i> | nga6172-1 (TACATCCGAATGCCATTGTTCCCTATCATTG)<br>nga6172-2 (AGCACATCAAGCTGCTTCCTTATAGCGTCC)   |              | 170                | 150        |
| SEC305              | <i>At3g05850</i> | SEC305-1 (ATATAGCAAAGCGTGACAGCAGAG)<br>SEC305-2 (GGGGACCTTATTAGCTGCGACTTCTG)                | <i>TaqI</i>  | 73,<br>71          | 144        |
| SEC310              | <i>At3g06010</i> | SEC310-1 (TTGCACTGGTATGAATGTTATGTCTGAAA)<br>SEC310-RsaI (TGTTTTCTTTCTCTAAACGTCCATCGTA)      | <i>RsaI</i>  | 75,<br>25          | 100        |
| SEC327              | <i>At3g06470</i> | SEC327-Taql (CTCTGGGACCCACTTTCATGAAAATTAGTC)<br>SEC327-2 (CGAAGTTTGGGGAGTTGACGTTTGAAGAT)    | <i>TaqI</i>  | 100                | 71,<br>29  |
| SEC328              | <i>At3g07530</i> | SEC328-DdeI (AAGCATTGACTACCAGAGCTATTAGTGTC)<br>SEC328-2 (CTCAAACAATACTCACAGAATAACAATG)      | <i>DdeI</i>  | 178                | 152,<br>26 |
| SEC320              | <i>At3g07770</i> | SEC320-1 (AACTAACACGAAAATAAACCAACATACAAAC)<br>SEC320-EcoRI (ACGTTTGATGGTACAATTCATCATGCGAAT) | <i>EcoRI</i> | 204,<br>28         | 232        |
| SEC321              | <i>At3g07810</i> | SEC321-1 (AAAAACAATAAAGATGCAGAATGGCTACT)<br>SEC321-RsaI (TTTGATTATCCTCGTCTTCTTTCTGGAATG)    | <i>RsaI</i>  | 137,<br>29         | 166        |
| SEC316              | <i>At3g08910</i> | SEC316-1 (GATATCTTCTCGGAGTTCTTTGGCTTC)<br>SEC316-Hinfl (AGGGGCAGCTTTCCTCGGTGGAACAAGATT)     | <i>Hinfl</i> | 86                 | 59,<br>27  |
| SEC314              | <i>At3g10200</i> | SEC314-1 (CAGGTTGGGGAATATGATGACTAATG)<br>SEC314-MseI (GTTTTTCATGACCATCTTTGGGAGCAAATTA)      | <i>MseI</i>  | 132,<br>28         | 160        |
| nga162              | <i>At3g13960</i> | nga6162-F (CATGCAATTTGCATCTGAGG)<br>nga6162-R (CTCTGTCACTCTTTTCCTCTGG)                      |              | 107                | 89         |
| MRC8                | <i>At3g18160</i> | MRC8-F1 (CTCTTTTATACGCAAATATGCCTCAGTAGC)<br>MRC8-R1 (ACTGAAAGATATGTAATACACGGTGCCT)          | <i>TaqI</i>  | 150,<br>100        | 250        |
| LCS341              | <i>At3g23633</i> | LCS341-1 (AGTTTTTCTTCTTTTTGTATTTATGTG)<br>LCS341-Hinfl (TTGTGCTTTTGCTTTTTAAAGCCGATT)        | <i>Hinfl</i> | 142,<br>30         | 172        |
| LCS336              | <i>At3g25200</i> | LCS336-1 (AGGTCTGAAAAAGCTGAGTTGAGGTC)<br>LCS336-Scal (GGAGTCGGATATAGCAGTACCAATACAGTA)       | <i>Scal</i>  | 128,<br>30         | 158        |
| F13I12              | <i>At3g47200</i> | F13I12-F (GATGAACACCAATTCCTCTATGAAGTAAGC)<br>F13I12-R (ATATTTCTTTCCCGTTAGGTGGTTGTC)         | <i>RsaI</i>  | 180,<br>63         | 301        |
| T4C21               | <i>At3g60770</i> | T4C21-1 (CTTGCTCCAGTAACACTTTTCACCTGTGG)<br>T4C21-4 (GATGTGTTTGCTTGCCTCTCCAAGTTAGC)          | <i>ApoI</i>  | 122,<br>95         | 217        |
| Nga6                | <i>At3g62220</i> | nga66-1 (GTCCAGGGAACAAAGTGGGTCCCTTGG)<br>nga66-2 (GTCACACCCACAACCTCGTAAAGCGCG)              |              | 280                | 250        |

Table S2 continued

| Marker              | Nearest gene     | Primer name (5' to 3' sequence)                                                       | Enzyme        | Amplicon size (bp) |             |
|---------------------|------------------|---------------------------------------------------------------------------------------|---------------|--------------------|-------------|
|                     |                  |                                                                                       |               | Col                | Ler         |
| <b>Chromosome 4</b> |                  |                                                                                       |               |                    |             |
| LCS413              | <i>At4g25150</i> | LCS413-1 (GGGTTCTTATAATCCACTTCCTC)<br>LCS413-XhoI (GAATCAAGGAGAAGAGAATGAGATTCTCGA)    | <i>XhoI</i>   | 163,<br>30         | 193         |
| LCS414              | <i>At4g27830</i> | LCS414-1 (TTTTGGTTTACATCGCTAC)<br>LCS414-EcoRI (TATTTACACTTCATATTTAAAAATTGAATT)       | <i>EcoRI</i>  | 225                | 195,<br>30  |
| LW 147              | <i>At4g34270</i> | Nga1107-1 (GAAGAAATAATTTACTCAAAGCGCG)<br>Nga1107-2 (GAGCGACGAATCGACAGAATTAGGG)        |               | 170                | 160         |
| Nga1107             | <i>At4g38760</i> | LW147-1 (TCGAAGGAAACCCAAAAA)<br>LW147-2 (TTGAGGCGTTGAAGGAAG)                          | <i>RsaI</i>   | 357,<br>104        | 461         |
| LCS416              | <i>At4g39300</i> | LCS416-1 (ATACTGATTAGATGTGAAACTGGATG)<br>LCS416-XbaI (AATCTAAGACCAACTAGACATATATCTCTA) | <i>XbaI</i>   | 194                | 163,<br>31  |
| LCS417              | <i>At4g39350</i> | LCS417-1 (TATCCCAATCTAATCTATCACAACCCCTTCC)<br>LCS417-2 (AGCCAGCAATGAGCCGACCACCAG)     | <i>SpeI</i>   | 279,<br>156        | 435         |
| <b>Chromosome 5</b> |                  |                                                                                       |               |                    |             |
| CIW18               | <i>At5g05170</i> | CIW18-1 (AACACAACATGGTTTCAGT)<br>CIW18-2 (GCCGTTTGTCTCTTCCAC)                         |               | 135                | 129         |
| nga249              | <i>At5g08550</i> | nga249-F (TTACCGTCAATTTTCATCGCCG)<br>nga249-R (TGGATCCCTAACTGTAAAATCCC)               |               | 125                | 115         |
| nga106              | <i>At5g16520</i> | nga106-F (GTTATGGAGTTTCTAGGGCAGC)<br>nga106-R (TGCCCCATTTTGTCTTCTC)                   |               | 150                | 120         |
| F7K24               | <i>At5g19270</i> | F7K24-1 (TGCAAAATCTAGCTATCG)<br>F7K24-2 (ACTTTTGTATGGCTAATGAG)                        |               | 125                | 141         |
| MWD9                | <i>At5g22420</i> | MWD9-1 (TAGGGTCGTGGTTGGTTG)<br>MWD9-2 (CTGGCCTCTCTATCTGATAC)                          |               | 133                | 118         |
| GA3                 | <i>At5g25900</i> | GA3-1 (CGGAGGCTATCATGTCCCTGC)<br>GA3-2 (CCCAACGCTTCTTATCCATGTTGC)                     |               | 156                | 144         |
| S0191               | <i>At5g37780</i> | S0191-F2 (AGCATATCTCCACCAATCATGCAAATG)<br>S0191-R2 (GTGAGGCTGATGTTGATGGAGATGGTC)      |               | 180                | 200         |
| K16E1               | <i>At5g42590</i> | K16E1-F (GGTGATCGTCATGTGTCTC)<br>K16E1-R (AACTACTAGTTCATTGTAAA)                       |               | 166                | 148         |
| MNJ7                | <i>At5g47445</i> | MNJ7-1 (CGAAGAAGAAGAACTTTCTG)<br>MNJ7-2 (GTTAAGTGTAACCGGTATG)                         |               | 111                | 101         |
| JV57                | <i>At5g60710</i> | JV57-1 (TCCGATTGGTCTAAAGTACGAC)<br>JV57-2 (TTTGATGGACTCTTACATTGGAAA)                  |               | 180                | 140         |
| MBK5                | <i>At5g63640</i> | MBK5-1 (GTACAAAATCACTGTTGTTTACC)<br>MBK5-2 (CAGCTTGAGCATTTTACAGAGACG)                 |               | 220                | 200         |
| MHJ24               | <i>At5g64060</i> | MHJ24-1 (CACAAGTTCAACATCAGTCGGATG)<br>MHJ24-2 (GTGGAGATTATCTATCTGCTTACC)              | <i>BsmAI</i>  | 300,<br>150        | 450         |
| MNA5                | <i>At5g65290</i> | MNA5-4 (GTTAGAGGCAACGAGATCAGATAG)<br>MNA5-5 (CCGAACCGAGATCGAACCAAGG)                  | <i>MspA1I</i> | 135,<br>110        | 245         |
| DDM1                | <i>At5g66750</i> | DDM1-3 (GGAGCTCGTCGCTCCGGTTGC)<br>DDM1-4 (CACCGACTCAGCACTAGTCTCCC)                    | <i>RsaI</i>   | 470                | 350,<br>120 |
| M555                | <i>At5g67620</i> | M555a-1 (CTCTTGAATTATTAAGTTGACTAG)<br>M555a-2 (CCTTTAATTAGTTATCAAATC)                 | <i>AccI</i>   | 155                | 100,<br>50  |
