# Supplementary material
Source: HighWire-hosted journal article supplement (https://www.genetics.org/content/suppl/2016/09/07/genetics.116.193169)
Supplement: TableS7.pdf [file TableS7.pdf]

**Table S7:** Summary of mutant phenotypes

| Gene         | Allele         | Sucrose dependence | IBA or 2,4-DB response                | Peroxisome distribution | Peroxisome size | PTS2 processing | PTS1 import |
|--------------|----------------|--------------------|---------------------------------------|-------------------------|-----------------|-----------------|-------------|
| <i>SDP1</i>  | <i>sdp1-7</i>  | Wt                 | Wt                                    | Clustered               | Wt              | ND              | Wt          |
| <i>PXA1</i>  | <i>pxa1-4</i>  | Dependent          | Resistant                             | Clustered               | Wt              | Wt              | Wt          |
| <i>ACX1</i>  | <i>acx1-4</i>  | Wt                 | Resistant                             | Clustered               | Large           | Wt              | Wt          |
| <i>ACX2</i>  | <i>acx2-2</i>  | Wt                 | Wt                                    | Clustered               | Large           | Wt              | Wt          |
|              | <i>acx2-3</i>  | Wt                 | Wt                                    | Clustered               | Large           | Wt              | Wt          |
| <i>MFP2</i>  | <i>mfp2-6</i>  | Partial            | Wt                                    | Clustered               | Large           | Defect          | Defect      |
|              | <i>mfp2-7</i>  | Wt                 | Slight resistance                     | Clustered               | Large           | Wt              | Wt          |
|              | <i>mfp2-8</i>  | Partial            | Wt                                    | Clustered               | Large           | Defect          | Defect      |
|              | <i>mfp2-9</i>  | Partial            | Wt                                    | Clustered               | Large           | Defect          | Wt          |
| <i>PED1</i>  | <i>ped1-4</i>  | Dependent          | 2,4-DB resistant                      | Clustered               | Large           | Defect          | Defect      |
|              | <i>ped1-5</i>  | Dependent          | Resistant                             | Clustered               | Large           | Defect          | Defect      |
| <i>MLS</i>   | <i>mls-4</i>   | Partial            | Wt                                    | Clustered               | Wt              | Wt              | Wt          |
| <i>ICL</i>   | <i>icl-3</i>   | Wt                 | Wt                                    | Clustered               | Wt              | Wt              | Wt          |
|              | <i>icl-4</i>   | Wt                 | Wt                                    | Clustered               | Wt              | Wt              | Wt          |
|              | <i>icl-5</i>   | Partial            | Wt                                    | Clustered               | Wt              | Wt              | Wt          |
| <i>PMDH1</i> | <i>pmhd1-2</i> | Wt                 | 2,4-DB resistant                      | Clustered               | Wt              | ND              | Wt          |
| <i>CHY1</i>  | <i>chy1-5</i>  | Dependent          | Resistant                             | Clustered               | Large           | Defect          | Defect      |
|              | <i>chy1-6</i>  | Dependent          | Resistant                             | Clustered               | Large           | Defect          | Defect      |
|              | <i>chy1-7</i>  | Dependent          | Resistant                             | Clustered               | Large           | Defect          | Defect      |
| <i>MDAR4</i> | <i>mdar4-5</i> | Dependent          | Wt                                    | Clustered               | Wt              | ND              | Wt          |
|              | <i>mdar4-6</i> | Dependent          | Wt                                    | Clustered               | Wt              | ND              | Wt          |
|              | <i>mdar4-7</i> | Dependent          | Wt                                    | Clustered               | Wt              | ND              | Wt          |
| <i>LON2</i>  | <i>lon2-8</i>  | Wt                 | Resistant<br>(lateral roots)          | ND                      | Large           | Defect          | Defect      |
|              | <i>lon2-9</i>  | Wt                 | Slightly resistant<br>(lateral roots) | ND                      | Large           | Wt              | Defect      |
|              | <i>lon2-10</i> | Wt                 | Resistant<br>(lateral roots)          | ND                      | Large           | Defect          | Defect      |
| <i>PXN</i>   | <i>pxn-4</i>   | Wt                 | Wt                                    | ND                      | Large           | Wt              | Wt          |
|              | <i>pxn-5</i>   | Wt                 | Wt                                    | ND                      | Large           | Wt              | Wt          |
|              | <i>pxn-6</i>   | Wt                 | Wt                                    | ND                      | Large           | Wt              | Wt          |
|              | <i>pxn-7</i>   | Wt                 | Wt                                    | ND                      | Large           | Wt              | Wt          |
| <i>DRP3A</i> | <i>drp3a-4</i> | Wt                 | Wt                                    | Wt                      | Large           | ND              | Wt          |
|              | <i>drp3a-5</i> | Wt                 | Wt                                    | Wt                      | Large           | ND              | Wt          |
| <i>PME31</i> | <i>pme31-1</i> | Wt                 | Wt                                    | Clustered               | Wt              | ND              | Wt          |
|              | <i>pme31-2</i> | Wt                 | Wt                                    | Clustered               | Wt              | ND              | Wt          |
|              | <i>pme31-3</i> | Wt                 | Wt                                    | Clustered               | Wt              | ND              | Wt          |

ND, not determined.
